# Supplementary material for: Fe, Ni-codoped W18O49 grown on nickel foam as a bifunctional electrocatalyst for boosted water splitting
Source: Royal Society of Chemistry journal article supplement (doi:10.1039/d1dt01468d), 2021-01-01
Supplement: d1dt01468d1.pdf [file d1dt01468d1.pdf]

## Supplementary Material

# Fe, Ni-codoped $W_{18}O_{49}$ grown on nickel foam as bifunctional electrocatalyst for boosted water splitting

Guojuan Hai<sup>a,b</sup>, Jianfeng Huang<sup>a,\*</sup>, Liyun Cao<sup>a,\*</sup>, Koji Kajiyoshi<sup>c</sup>, Long Wang<sup>b</sup>, Liangliang Feng<sup>a</sup>,

Yijun Liu<sup>d</sup>, Limin Pan<sup>d</sup>

<sup>a</sup> School of Material Science and Engineering, International S&T Cooperation Foundation of Shaanxi Province, Xi'an Key Laboratory of Green Manufacture of Ceramic Materials, Shaanxi University of Science and Technology, Xi'an, 710021, China

<sup>b</sup> Faculty of Engineering and Information Sciences, University of Wollongong, Northfields Avenue, Wollongong, NSW 2522, Australia.

<sup>c</sup> Kochi University, Research Laboratory of Hydrothermal Chemistry, Kochi 780-8520, Japan.

<sup>d</sup> Guangdong Monalisa Ceramics Co., Ltd. Guangdong, Foshan 528211, China.

*E-mail addresses: [huangjf@sust.edu.cn](mailto:huangjf@sust.edu.cn)*

*[caoliyun@sust.edu.cn](mailto:caoliyun@sust.edu.cn)*

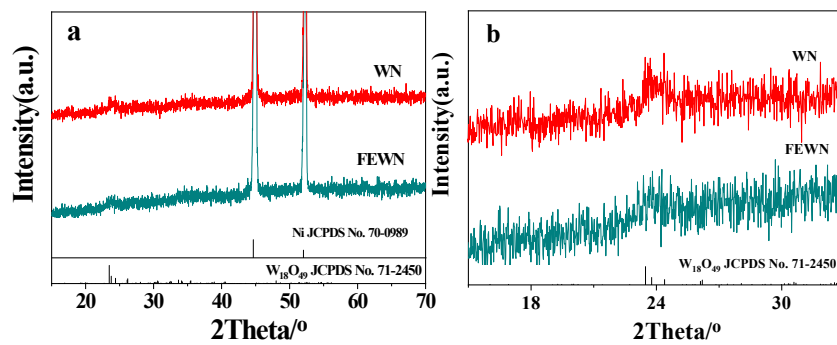

**Fig. S1.** XRD patterns of (a) as-synthesized Ni-doped  $W_{18}O_{49}/NF$  (WN) and Fe, Ni-codoped

$W_{18}O_{49}/NF$  (FEWN). (b) 2Theta range: 15~33° .

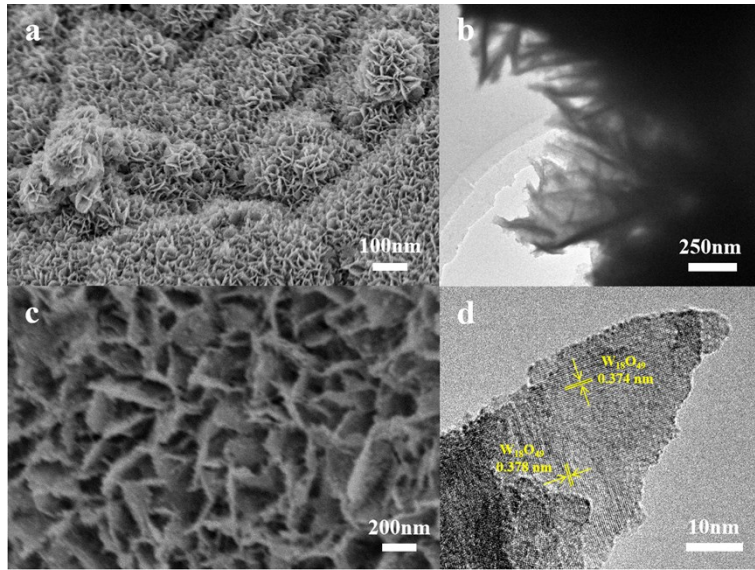

**Fig. S2.** (a, c) SEM, (b, d) TEM and (c) HRTEM images of Ni-doped  $W_{18}O_{49}/NF$  (WN).

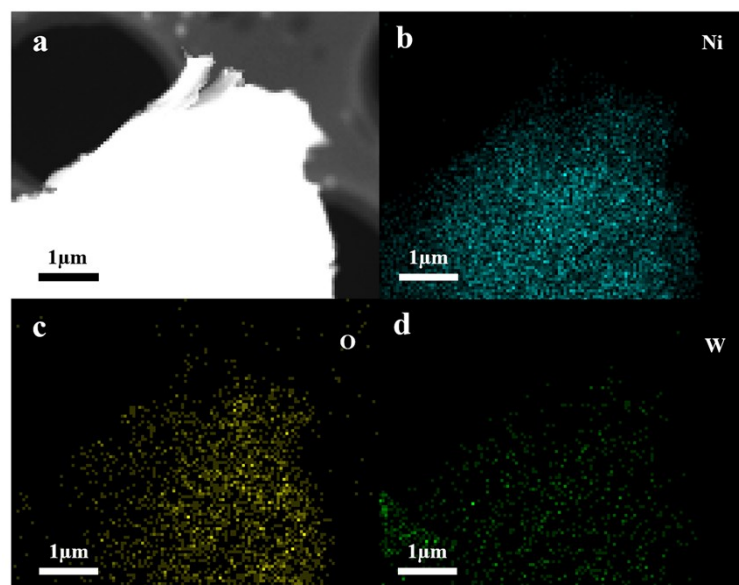

**Fig. S3.** (a) STEM image and (b-d) Elemental mappings of W, Ni and O of Ni-doped

$W_{18}O_{49}/NF$  (WN).

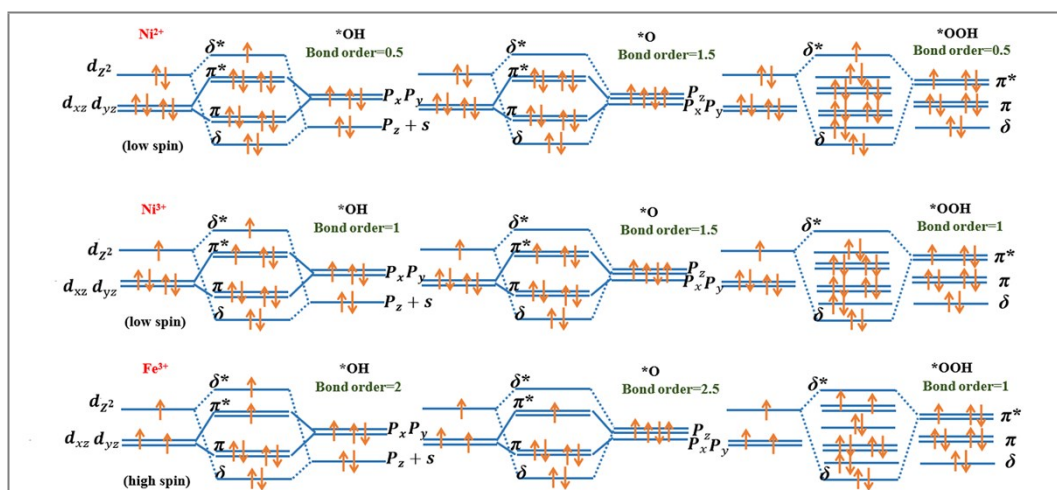

**Fig. S4.** The orbital interactions between cations ( $\text{Ni}^{2+}$ ,  $\text{Ni}^{3+}$ ,  $\text{Fe}^{3+}$ ) and the OER intermediates.

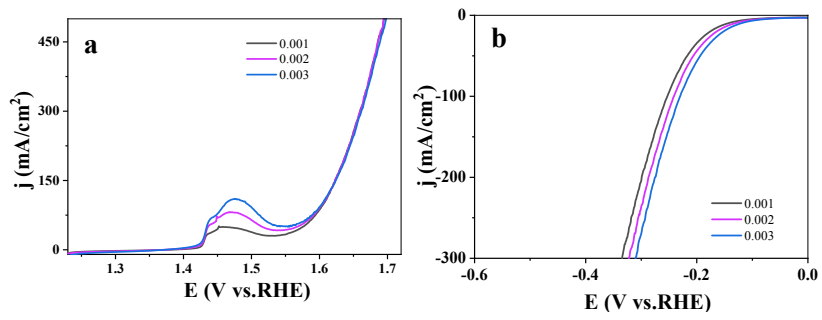

**Fig. S5.** (a) OER and (b) HER polarization curves of Fe, Ni-codoped  $W_{18}O_{49}/NF$  measured at different sweep speeds.

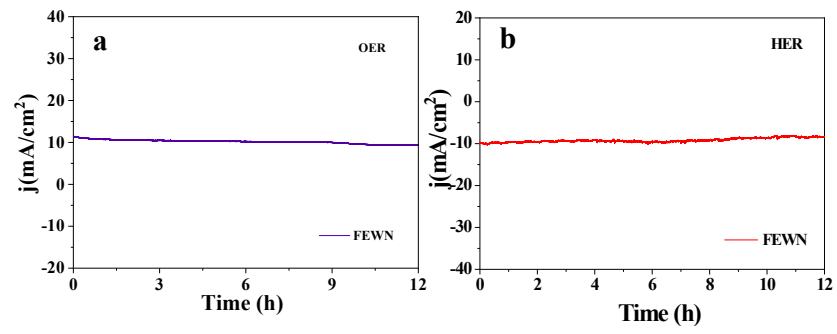

**Fig. S6.** Chronopotentiometry curves of Fe, Ni-codoped  $W_{18}O_{49}/NF$  for water splitting at 10 mA cm<sup>-2</sup> in a 1 M KOH solution: (a) OER, (b) HER.

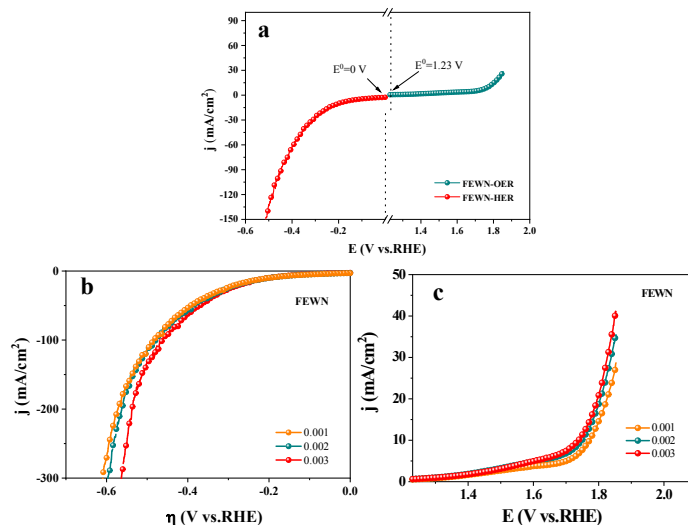

**Fig. S7.** (a) Polarization curves of Fe, Ni-codoped  $W_{18}O_{49}/NF$  in neutral media, (b)

Overpotentials required for different current densities, OER and (b) HER polarization curves of

Fe, Ni-codoped  $W_{18}O_{49}/NF$  measured at different sweep speeds in neutral media.



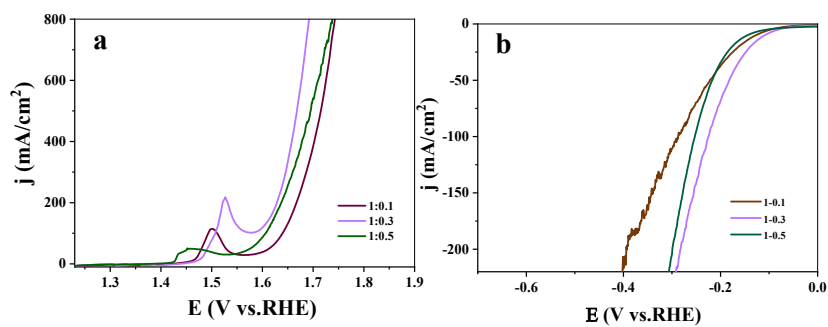

**Fig. S8.** Polarization curves of Fe, Ni-codoped  $W_{18}O_{49}/NF$  measured in 1M KOH. The molar ratios of  $WCl_6:FeCl_2 \cdot 4H_2O$  is 1:0.1, 1:0.3 and 1:0.5, respectively.

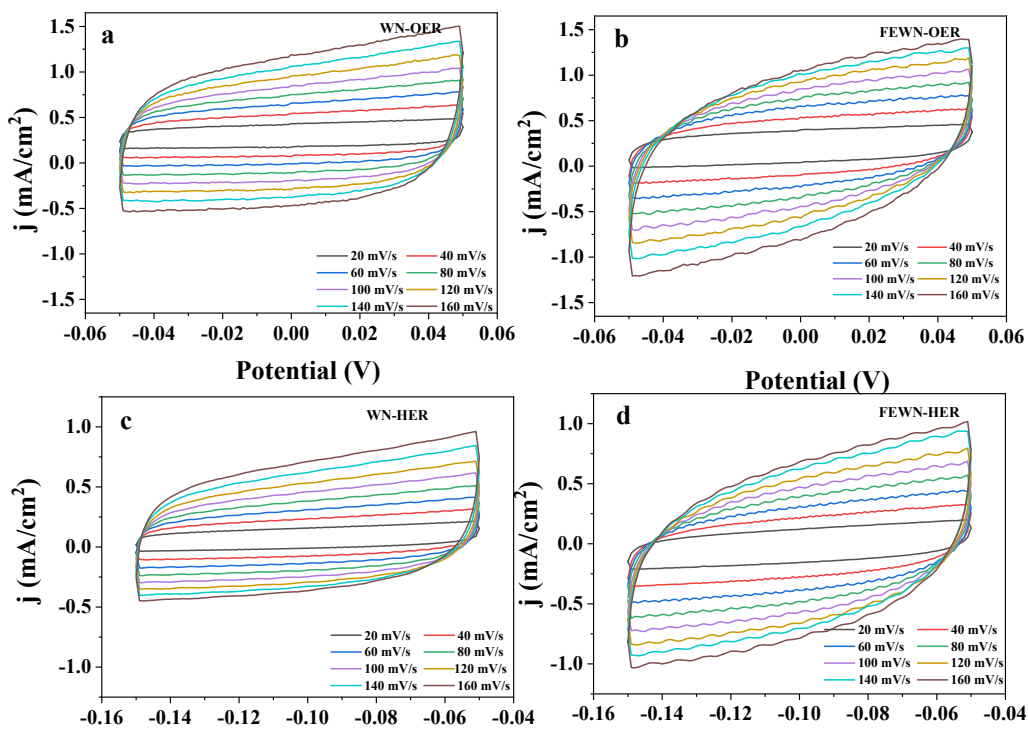

**Fig. S9.** CV curves obtained at different scanning rates of Ni-doped  $W_{18}O_{49}/NF$  (WN) and Fe, Ni-codoped  $W_{18}O_{49}/NF$  (FEWN).

**Table S1.** Comparison of charge transfer resistance ( $R_2$ ) values of all samples in alkaline solution (OER).

| Catalysts | $R_S(\Omega)$ | $R_1(\Omega)$ | $R_{ct}(\Omega)$ |
|-----------|---------------|---------------|------------------|
| NF        | 4.39          | 2.00          | 28.01            |
| WN        | 4.00          | 2.12          | 10.97            |
| FEWN      | 3.98          | 1.34          | <b>4.43</b>      |

**Table S2.** Comparison of charge transfer resistance ( $R_2$ ) values of all samples in alkaline solution (HER).

| Catalysts | $R_S(\Omega)$ | $R_1(\Omega)$ | $R_{ct}(\Omega)$ |
|-----------|---------------|---------------|------------------|
| NF        | 3.847         | 2.308         | 21.81            |
| WN        | 3.442         | 1.73          | 4.68             |
| FEWN      | 3.31          | 0.80          | <b>2.99</b>      |
